# Supplementary material for: Novel expression of Haemonchus contortus vaccine candidate aminopeptidase H11 using the free-living nematode Caenorhabditis elegans
Source: PubMed Central journal article supplement (PMC4176091; doi:10.1186/1297-9716-44-111), 2013-12-01

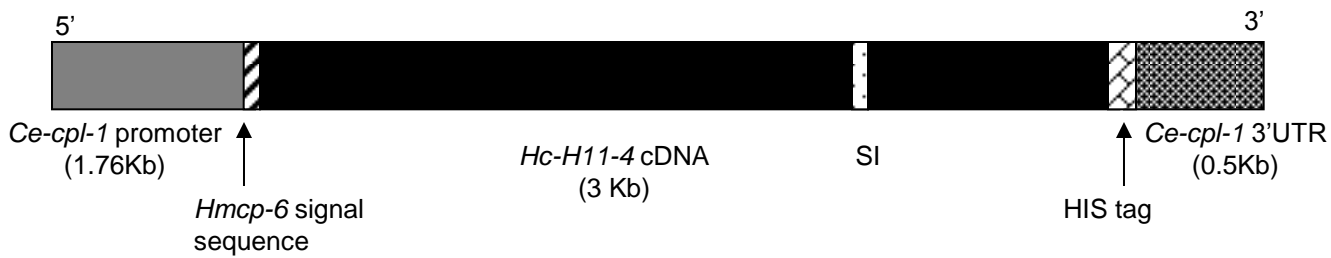

Supplement: 1297-9716-44-111-S1.pdf [file 1297-9716-44-111-S1.pdf]
