# Supplementary material for: Novel expression of Haemonchus contortus vaccine candidate aminopeptidase H11 using the free-living nematode Caenorhabditis elegans
Source: PubMed Central journal article supplement (PMC4176091; doi:10.1186/1297-9716-44-111), 2013-12-01
Supplement: 1297-9716-44-111-S2.pdf [file 1297-9716-44-111-S2.pdf]

Hc H11 MTSQG-----RTRTLNLTPIRLIVALFLVAAVGLSIGLTYFTRKAFDTSSEKPGKDDTGKDKDNDSPSAEELLSPNIKPLSYDLTIKTYLPGYVDFPPEK**NLT**  
Hc H11-4 MTARE-----RKRSLVE**FTPFSLAFAMFAVAAVGLAIGLTYFTRKAFDPTQKD-KDQPGGKEKDNPSAEELLSPNIKPLLYDLTIKTYLPGYVDFPPEK**NLT****  
Hc H11-2 MTAEW-----QKRRIL**GFSPISLLCTLEFLVAAVGLSIGLTYFTRKAFDTSQKEQKDDTGKKEKDNPSAEELLSPNIKPVSYDLSIKTYLPGYVDFPPEK**NLT****  
Hc H11-1 MTAESQEQETQQRKNTVLRRLTPIKSLFALLVVAAVGLSIGLTYFTRKAFDPTGGNGK-EDQP IVDNNDSPSAEELRLPTTIKPLTYDLVIKTYLPGYVDFPPEK**NLT**  
Hc H11-5 MTVQW-----TKRTVLRKFT**PITLLLLLFLVAAVGLSIGLTYFTRKAYDTTEKN---K-DHGADDNPSAEELRLPKNIEPLLYDLSIKTYLPGYVDFPPEK**NLT****

Hc H11 FDGRVEISMVVEPTKSIVLNSKKI SIVIPQCELVSGDKKLEIESVKEHPRLEKVEFLIKSLEKQDQIILLKVGYIGLISNSFGGIYQTTYTPDGTGPK-IAAVSQNEPI  
Hc H11-4 FDGRVEISMVVEPTKSIVLNAKKITVIPAECVLSGTQKLDIESVKEHERLEKLEFRLKSRLEKQKILLKITYAGLISNTLGGIYQTTYTDANGNPK-IAAVSQNEPI  
Hc H11-2 FDAHVEISMVVEPTNSIVLNSKKITLAQGGCELVSGNQLDIESVKEHPRLEKLEITLKNQLQKEKILLKITYTGLISNTLGGIYQTTYTDANGNPK-IVAVSQNEPS  
Hc H11-1 IDGTVVIAEMEVEPTKSIVLNSK**NIS**VIADQCELVSGNQLDIEKIVDQPRLEKVEFVLLKLEKNQKITLKIYVIGLINDMLGGLYRTTYTDKDGTTK-IAACTHMEPT  
Hc H11-5 FDGQVGISLRVVEPTKSIVLNSK**NTI**VIPDKCELVSGDKKLEIESVKEHERLEKLEILLKNRLEKQEVLLKVGTYGIIISNTLGGIYQATYTDGTGTVKRIAATQHCPS

Hc H11 DARRMVMPCDEPKYK**ANWT**VTVIHPKGTAKAVSNGIEVNGDGEISGDWITSKFLTPRMSYLLAVMVSEFEYIEGETKTGVFRFIWRSRPEAKMTQYALQSGIKCIEFYE  
Hc H11-4 DGRMVMPCDEPKYK**ANWT**VTVIHPKGTAKAASNSIEINGEGDVSGDWITSKFFTPRMSYLLAVFISEFDFVEGRTKQDVFRFIWRSRPEAKMTKYALESIGIKCIEFYE  
Hc H11-2 DARRIAPCFDEPKYKAWTIVTVVHPKGTAKAASNGIEANGELQGDWITSKFFTPRMSYLLAII VCEFEYIEGKTETGVFRFIWRSRPEAKMTAYALDAGIRCLFYE  
Hc H11-1 DARLMVPCFDEPTFK**ANWT**VTVIHPKGTSAVNSGIEK-GEDEVSGDWITRFDPTPRMSYLLALVISEFKYIEN**YNT**KSGVFRFIWARPEAKMTEYAMIAGIKCLDYE  
Hc H11-5 DARRLVPCLEDEPSFKASWTVTVIHPKGTAKAVSNGIETNGKGEVSGDWIISKFFTPRMSYLLAVVSEFDYIEGFTKSGVFRFIWRSRPEAK**NMT**AYARDAGIRCLFYE

Hc H11 DFFDIRFPLKKQDMIALPDFSA**GAMEN**WGLITYRENSLLYDDR FYAPMKN--QRIARIVA**HELAH**QWFGDLVTMKWDDNLWLNEGFAFTEF IGAGQITQDDARMRNYFL  
Hc H11-4 DFFDIKFPPLKKQDMIALPDFSA**GAMEN**WGLITYRENSLLYDEKFGYPTNK--RRVAVVA**HELAH**QWFGDLVTMKWDDDLWLNEGFAFTEFVEYIGADQIGDHYFNMPDFFL  
Hc H11-2 DFFDIKFPLEKQDMIALPDFTA**GAMEN**WGLITYRENSLLYDEKFIYAPMKN--QRVALVVA**HELAH**QWFGDLVTMKWDDTLWLNEGFAFTEFVEYIGADQISHNNFRQDFFL  
Hc H11-1 DFFGKFPPLPKQDMIALPDFSS**GAMEN**WGLITYRENSVLYDENLYGPMKN--ERVAEVIA**HELAH**QWFGDLVTMKWDDNLWLNEGFAFTEFVEYIGADFISDGLWEMKDFFL  
Hc H11-5 NFFDIKFPPLKKQDMIALPDFS**GAMEN**WGLITYRENSLLYDDRYTPIIQATQLVALVVA**HELAH**QWFGDLVTMKWDDDLWLNEGFAFTEFVEYIGTDEIN**NT**IRMDDFFL

Hc H11 IDVLERALKADSVASSHPLSFRIDKAAEVEEAFDDITYAKGASVLTMLRALIGEEKHKHAVSQYLKFSYSNAEATDLWAVFDEVVTDVEGPDGKPKMKTTEFASQWTT--  
Hc H11-4 IGALERALKADSAASSHPLSFRIDKAVEVEEAFDDISYAKGASITMLRALIGEDKHKHAVTQYLKFSYSNAQASDLWEVDFDEVVTDIRGPDGKPKMKTTEFADQWTT--  
Hc H11-2 LDGMDRGMRASSAASSHPLSFRIDKAAEVAEAFDDISYAKGASVLTMLRALIGEDNRYNAVQYLKFSYSNAQAADLWNVFNEVVKGVKGPDGVMKIDQFTDQWTY--  
Hc H11-1 LAPYTSGITADAVASSHPLSFRIDKAAADVSEAFDDITYRKGASVLMQLLNLVGDENFKQSVSRYLKKFSYDAAAEDLWAAFDQVQGITGPNGGPLKMSEFAPQWTT--  
Hc H11-5 PNVLVKALDADAVSSTHPLSFRVDKAAEVEEAFDRITYEKGASVLMQLQALIGQKNYKQAVTQYLKFSYSNAQASDLWVDFDEVVTDVKGPDGKPKMKTTEFASQWTTQV

Hc H11 QMGFPVIVSAEFNSTTLKLTQSRYEANKDAVEKEKYRHPKYGFKWDIPLWYQEGDKKEIKRTWLRDRDEPLYLHVSDAGAPFVFNADRYGFYRQNHNDANGWKKIKKQLKDN  
Hc H11-4 QMGFPVIVTVEAF**NAT**SVKISQSRFKTKNDAKEPEKYRHPKYGFKWDIPLWYQEGDNKQVQVWIRREPLYLHVNDLSKPFVFNADRHGFYRQNYDADGWRKIKKQLRDN  
Hc H11-2 QMGYPVVKVEEFNATSLKVTQSRKYTKNDALEPEKYRHPKYGFKWDVPLWYQEGNSKEVKTWLRDRDEPLYLHVNNRDISLVFNADRHGFYRQNYDANGWKKIKKQLKDN  
Hc H11-1 QMGFPVIVTVEAF**NAT**SVKISQSRFKTKNDAKEPEKYRHPKYGFKWDVPLWYQEGDNKQVQVWIRREPLYLHVNDLSKPFVFNADRHGFYRQNYDADGWRKIKKQLRDN  
Hc H11-5 QMGFPVIVTVEAF**NAT**SVKISQSRFKTKNDAKEPEKYRHPKYGFKWDVPLWYQEGDNKQVQVWIRREPLYLHVNDLSKPFVFNADRHGFYRQNYDADGWRKIKKQLRDN

Hc H11 HEVYSPRTRNAIISDAFAAAATDAIEYETVFELLNYAEKETEYLPLEIAMSGISSILKYFGTEPEAKPAQTYMMNLIKPMYKSSIDFIANNYRNDKLFQINLQKDVID  
Hc H11-4 HKVFSRTRNAIISDAFALASVNAIEYETVFELLKYAVNEEEFIPWTEAISGIFAVLKFFGNEPEKPAEAYMMKILEPMYKSSDLGYIAAKYKDDQLFSKINLQKDIID  
Hc H11-2 HKVFGPRTRNAIISDAFAAATIDAIDYETVFELLEYAKNEEEFLPWKEALSGMFAVLKFFGNEPETKPARAYMMSILEP**MYNKS**SIDYIVKNYLDLFTKINTQKDIID  
Hc H11-1 YKVYGPTRNALISDAFAAAAVEEMDYETVFEMLYTVNEEDYLPWKEAISGFNTILDFFGSEPEQWASEYMRKLMKPIYDKSSIKFIAENYKDKLFFKNNLQIAVIS  
Hc H11-5 HKVCSARTRNAIGDAFAAALIDELEYETVFLLKLEYAKNEEEYLPWTEAISGFYAILDFFGNEPESISAKAFMKNLIKPMYKTSMKYIADNYENDSLFFEVNLQTSIID

Hc H11 MFCALGSQDCRKKYKFLDDEVMNCRDGGAAATECVRIAAPLRSSVYCYGVKEGGDYASDKVMELYTAETLALEKDFLRLALGCHKDVTALKGLLLRALDRNSSFVRMQD  
Hc H11-4 AYCALSQDCMKKYKDFDREVMNKNCDGDEATKCVSVAAPLRSSYCYGVKAGGTAFYAEKVKALYEEETVQLEKDMLLRALGCHRVDVTALKGLLLLAVDRNSSFVRLQD  
Hc H11-2 AYCALSQDCIKQYKDFYDEVMPKCKAGEAATKCVKVSAPLRANVYCYGVQEGGEEAFYAEKVMGLYLAEDVQLEKGLIFKALACHKDVDTALKGLLLRALDRKSSFVRLQD  
Hc H11-1 TYCALGKCELEEMKLFDEEVMKCRPGQATDCVKVTAPLRKTVYCYGVQEGGDEAFDKVMELYNAEQVQLEKDSLREALGCHKDVTALKGLLLRALDRNSSFVRLQD  
Hc H11-5 AYCFLGARECIKNYADLFDKEMKCKDGDKASKCVSIAAPLRKAYCYGVKEGGEAFAFDKVMKLYAENVQLEKDVLLQGLGCHKDITALKRLLLLALDRNSSFVRLQD

Hc H11 IPSAFNDVAANPIGGEFIFNFLIERWPDIIESIGTKHTYVEKVI PACTSGIRSQQQIDQLKLNQKNGMNRQFGAFDKAIERAQRNDVWIKKHFKLAAFFKATL-  
Hc H11-4 IPNAFQAVANPVGEEFMFNFLIERWGDIGSISGSEPTYVERVIPPCTSGIRSKQIDQLRNLHNGIHAQEYSTFVKEIERAEHKVDWIKKHFKKLAAFFKATL-  
Hc H11-2 VPTAFRAVSENVPVGEFMFNFLMERWEEITASLETEHRAVDKVVGACCTGIRSQQQIDQLKLNQKNAQAKKFGSFTQIEIEKGEHKIAWIKKHFKLSEFFKRARS-  
Hc H11-1 AHDVFNIVSRNPVGNELFNFLTERWEEILESLSIRHRSVDRVIKACTRGLRSREQVQQLKNLYKNDKRAREYGAFGGAIERSEHRVKWIEKHFRKLAFFKKSNS-  
Hc H11-5 VAAVYAVSNPIGKEFMFNFLERWEEILEGLTTEHRAVERVIKACTAGIRLEQQIDQLRSLQKNGEHAREYGAFGDQIERAEHKINWIKKHMRKLSDFFEKSTR-
